# Supplementary material for: New balance capability index as a screening tool for mild cognitive impairment
Source: PubMed Central journal article supplement (PMC9899403; doi:10.1186/s12877-023-03777-6), 2023-02-04
Supplement: 12877_2023_3777_MOESM1_ESM.pdf [file 12877_2023_3777_MOESM1_ESM.pdf]

## Supplementary Information

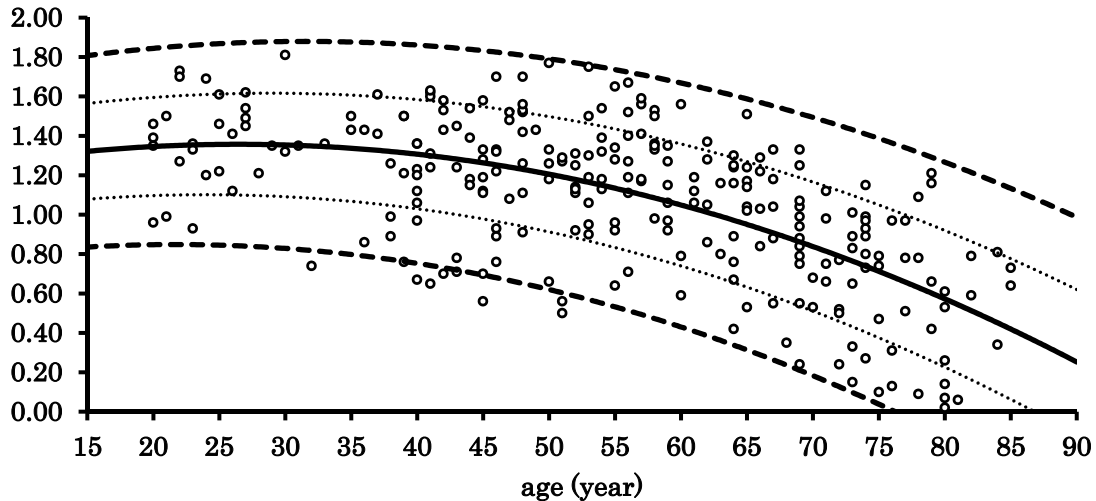

### Supplementary Figure S1. Correlations of age with eye-opened IPS on foam rubber.

Scatterplot showing dynamic balance values in healthy individuals ( $n = 256$ ). Lines depict mean, 68th, and 95th percentiles. Based on these data, age-predicted eye-opened IPS is calculated by  $-0.0003 \times \text{age}^2 + 0.0145 \times \text{age} + 1.1602$ .

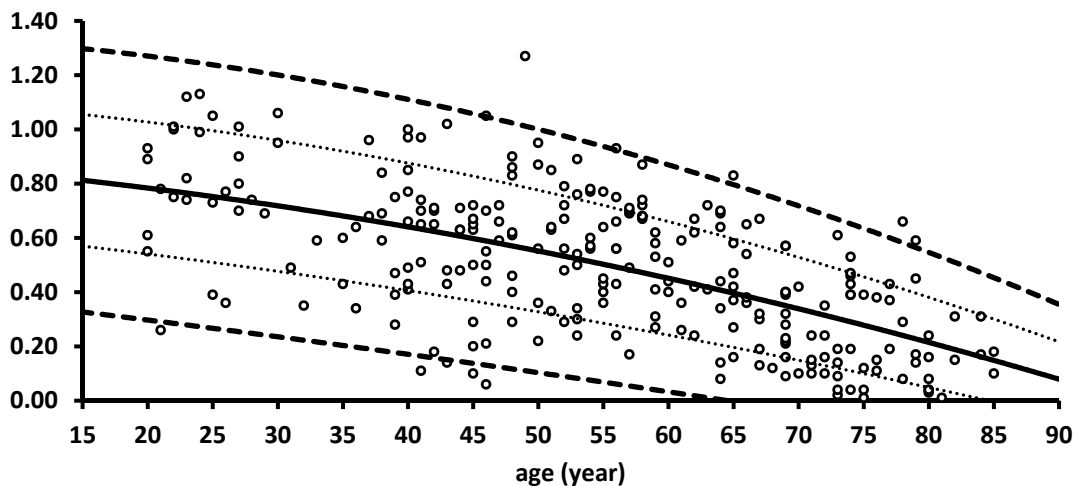

### Supplementary Figure S2. Correlations of age with eye-closed IPS on foam rubber.

Scatterplot showing dynamic balance values in healthy individuals ( $n = 256$ ). Lines depict mean, 68th, and 95th percentiles. Based on these data, age-predicted eye-closed IPS is calculated by  $-0.00006 \times \text{age}^2 - 0.0037 \times \text{age} + 0.8805$ .
